# Supplementary material for: An integrated approach based on micro-mapping analytical techniques for the detection of impurities in historical Zn-based white pigments
Source: Royal Society of Chemistry journal article supplement (doi:10.1039/c4ja00385c), 2015-01-01
Supplement: c4ja00385c1.pdf [file c4ja00385c1.pdf]

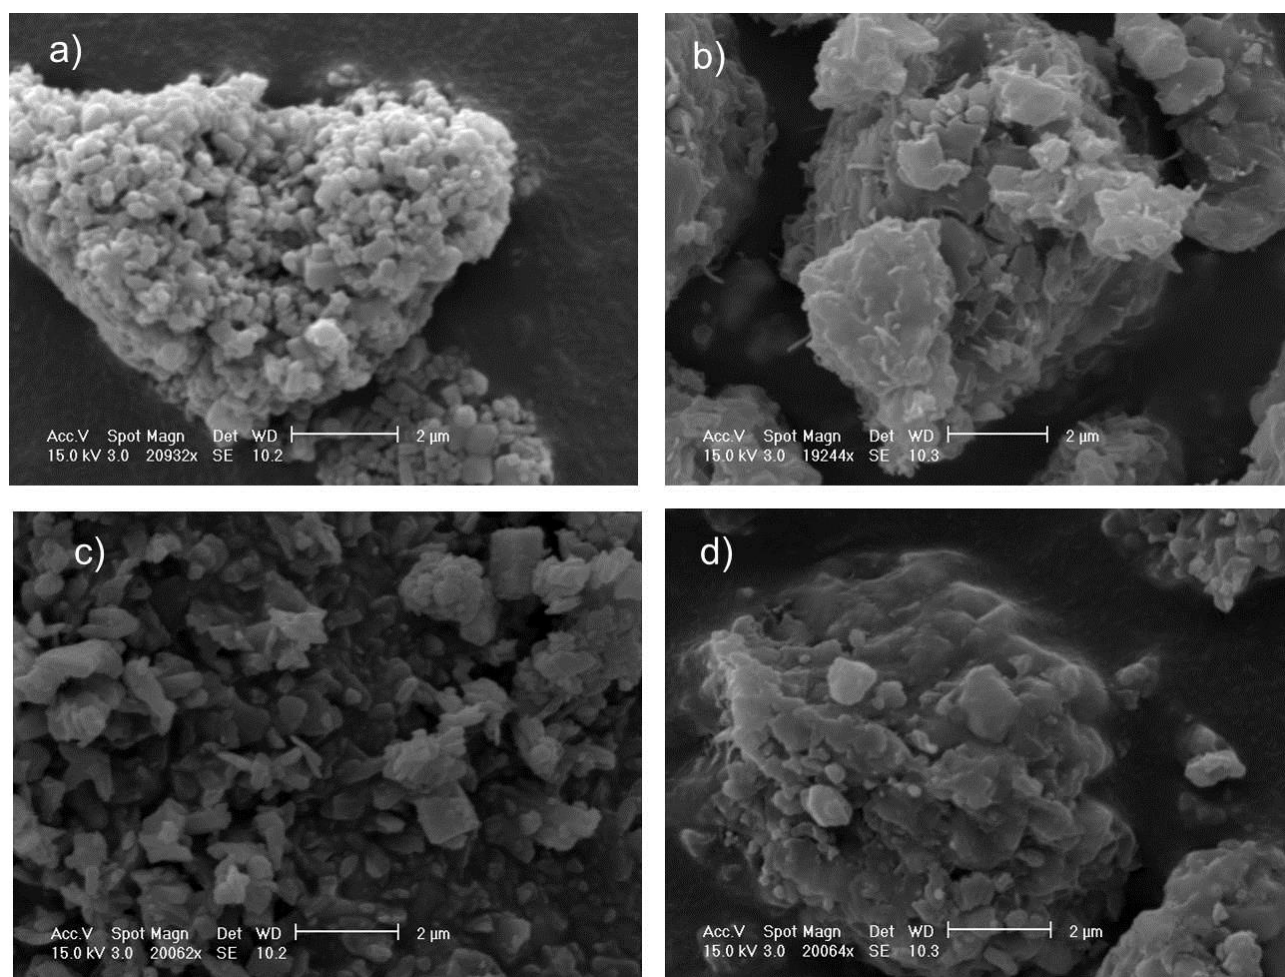

**Fig. S1** Secondary electron scanning microscope images of the historical samples a) WN1: submicron grains in the range of 100-500 nm and few larger conglomerates of about 0.7-1 μm with hexagonal shape; b) LF1: few polyhedral shaped conglomerates of 0.5-1 μm and needle-like shapes of about 200-500 nm diffusively present around the large conglomerates; c) LF2: grains of variable dimensions in the range of 0.2 -1 μm with a morphology varying from large polycrystalline angular conglomerates to smaller prismatic or acicular crystallites; d) LF3: few polyhedral shaped conglomerates of 0.5- 1 μm.
